# Supplementary material for: Striking influence of NiO catalyst diameter on the carbonization of polypropylene into carbon nanomaterials and their high performance in the adsorption of oils
Source: Royal Society of Chemistry journal article supplement (doi:10.1039/c4ra05016a), 2014-01-01
Supplement: c4ra05016a1.pdf [file c4ra05016a1.pdf]

## Electronic Supporting Information (ESI)

# Striking influence of NiO catalyst diameter on the carbonization of polypropylene into carbon nanomaterials and their high performance in the adsorption of oils

5 Jiang Gong, Jie Liu\*, Xuecheng Chen, Zhiwei Jiang, Xin Wen, Ewa Mijowska, Tao Tang\*

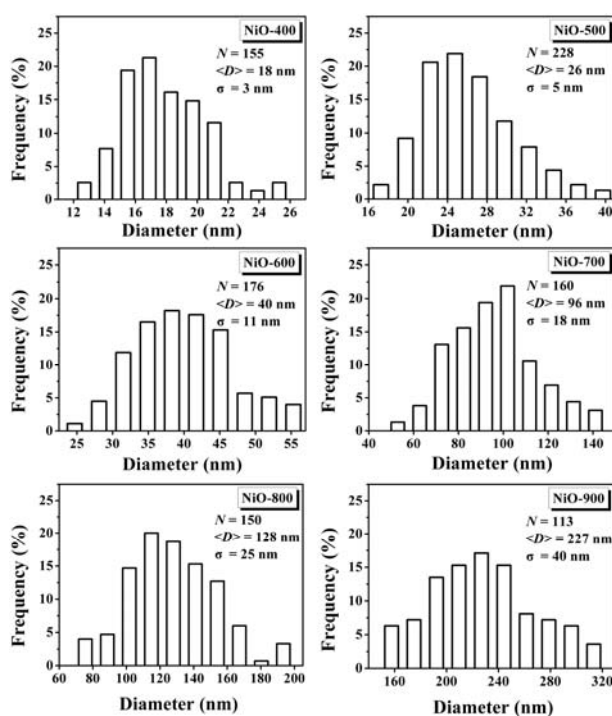

**Fig. S1** The diameter distribution of NiO catalysts according to TEM images (Fig. 3).

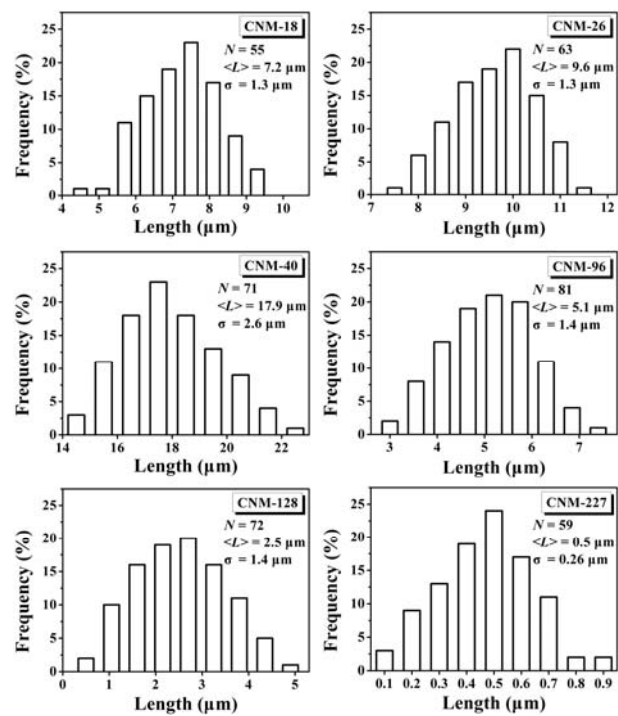

**Fig. S2** Effect of the diameter of NiO catalyst on the length distribution of CNMs.

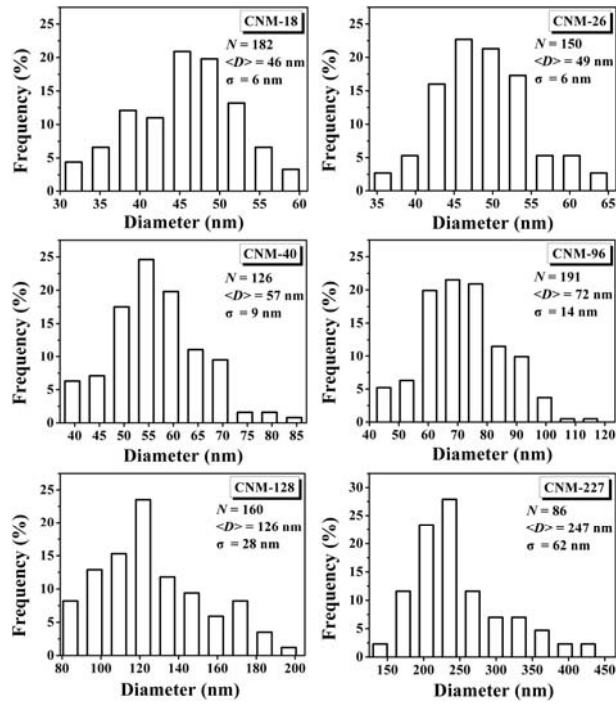

**Fig. S3** Effect of the diameter of NiO catalyst on the diameter distribution of CNMs.

5

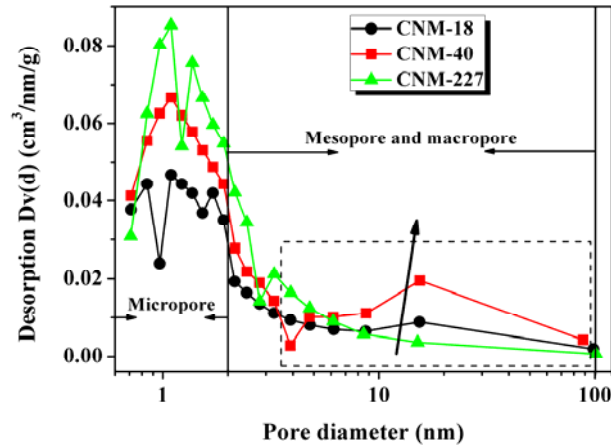

**Fig. S4** Pore size distributions of CNM-18, CNM-40 and CNM-227.

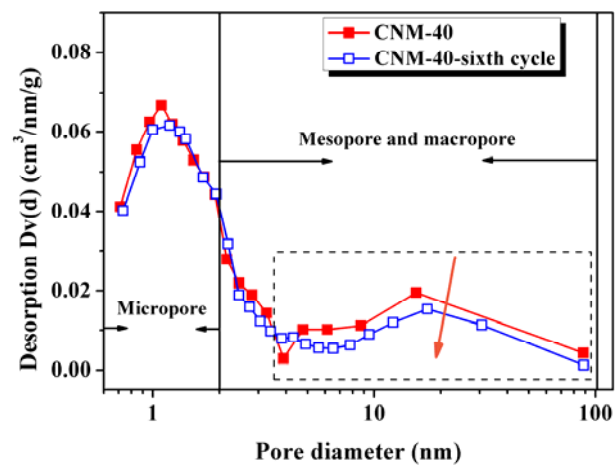

**Fig. S5** Pore size distributions of CNM-40 before and after the sixth cycle.
